# Supplementary material for: Diabetes Type 2 in the Berlin Aging Study II: Prevalence, Incidence and Severity Over up to Ten Years of Follow-up
Source: Research Square preprint supplement (doi:10.21203/rs.3.rs-1117909/v2), 2022-10-05
Supplement: Supplementary file 1 [file d1dd1e561a64649f0790e611.docx]

**Supplementary Tables & Figures**

**Diabetes Type 2 in the Berlin Aging Study II: Prevalence, Incidence and Severity over up to ten years of follow-up**

Johanne Spieker, Valentin Max Vetter, Dominik Spira, Elisabeth Steinhagen-Thiessen, Vera Regitz-Zagrosek, Nikolaus Buchmann4, Ilja Demuth

**Supplementary Table 1: DCSI variables applied to Berlin Aging Study II**

**Supplementary Table 2. Characteristics of BASE-II participants diagnosed with diabetes mellitus type 2 at baseline (N=209 of 1,671) and follow-up (N=185 of 1,083).**

| Variables | BASE-II baseline |  | BASE-II follow-up |  |
| --- | --- | --- | --- | --- |
|  | Mean (SD) or % | Number of observations | Mean (SD) or % | Number of observations |
| Females | 37.3 | 78 | 41.1 | 76 |
| Age (years) | 68.7 (3.7) | 209 | 75.6 (4.2) | 185 |
| T2D new diagnosis (unaware of disease) | 24.9 | 52 | 22.2 | 41 |
| Fasting glucose (mg/dl) | 129.0 (36.1) | 202 | 135.3 (33.0) | 185 |
| 2h-OGTT (mg/dl) | 213.3 (60.4) | 48 | 209.1 (36.0) | 39 |
| HbA1c (%) | 6.6 (0.8) | 197 | 6.5 (0.8) | 184 |
| Anamnestic history of T2D (self-report) | 72.8 | 150 | 70.8 | 131 |
| Antidiabetic medication | 53.4 | 111 | 54.1 | 100 |
| Smoking (packyears) | 14.5 (19.4) | 198 | 13.7 (21.6) | 169 |
| Alcohol (4 times a week or more) | 29.0 | 60 | 24.3 | 45 |
| RAPA score | 4.8 (1.6) | 200 | 4.6 (1.2) | 185 |
| BMI | 29.6 (4.7) | 205 | 29.1 (4.2) | 184 |
| Morbidity index* | 1.2 (1.3) | 191 | 1.7 (1.6) | 148 |

T2D = diabetes mellitus type 2; 2h-OGTT = oral glucose tolerance test (OGTT was only performed when T2D was not known); RAPA = rapid assessment of physical activity; BMI = body mass index; *modified version of the morbidity index originally described by Charlson (40), for details see (41).

**Supplementary Table 3: Impact (in percent) and absolute score values of each DCSI category in BASE-II at baseline and follow-up (N=111).**

| **DCSI category** | **Baseline % (absolute score value)** | **Follow-up % (absolute score value)** |
| --- | --- | --- |
| **Retinopathy** | 6.3 (7) | 9.0 (10) |
| **Nephropathy** | 21.6 (24) | 61.3 (68) |
| **Neuropathy** | 8.1 (9) | 26.1 (29) |
| **Cerebrovascular** | 1.8 (2) | 7.2 (8) |
| **Cardiovascular** | 43.2 (48) | 67.6 (75) |
| **Peripheral vascular**  **disease** | 27.9 (31) | 28.8 (32) |

**Supplementary Figure 1: Type 2 Diabetes diagnosis in women at follow-up (N=76).**


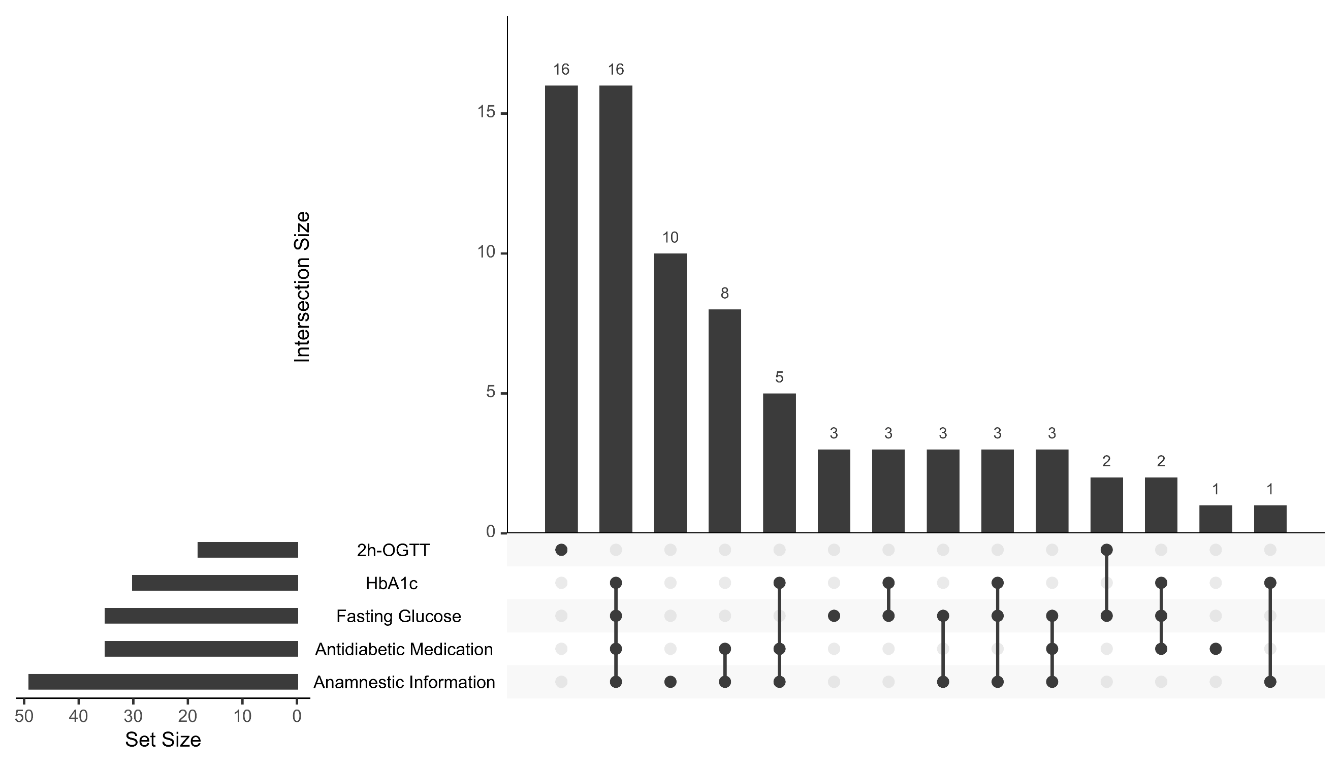
Diabetes diagnosis criteria at follow-up and their combinations (OGTT was only performed when T2D was not known): Anamnestic information, fasting glucose, antidiabetic medication, HbA1c and 2h-OGTT. OGTT= oral glucose tolerance test.

**Supplementary Figure 2: Type 2 Diabetes diagnosis in men at follow-up (N=109).**


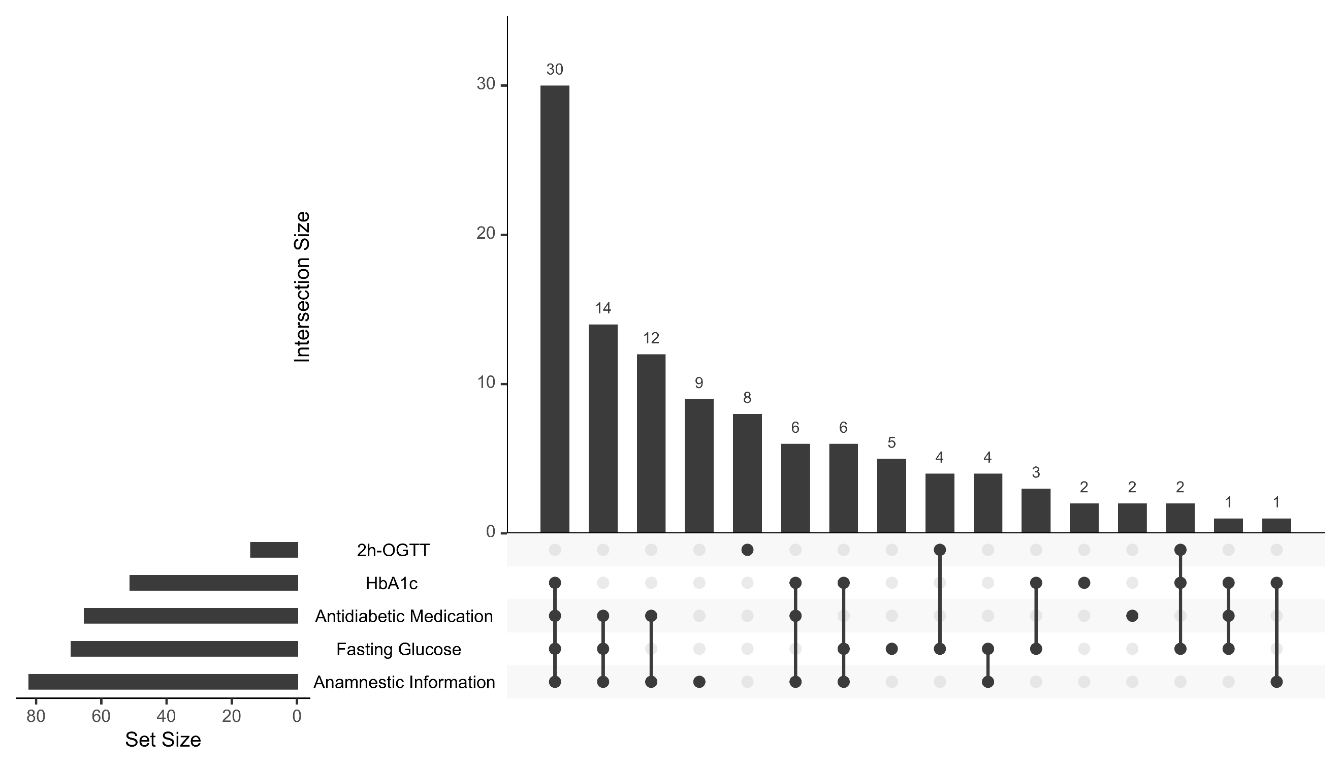


Diabetes diagnosis criteria at follow-up and their combinations (OGTT was only performed when T2D was not known): Anamnestic information, fasting glucose, antidiabetic medication, HbA1c and 2h-OGTT. OGTT= oral glucose tolerance test.
